1  
2  
3  
4  
5  
6  
7  
8  
9  
10  
11  
12  
13  
14  
15  
16  
17  
18  
19  
20  
21  
22  
23  
24  
25  
26  
27  
28  
29

**A FASII inhibitor prevents staphylococcal evasion of daptomycin by inhibiting phospholipid decoy production**

Carmen J. E. Pee<sup>1‡</sup>, Vera Pader<sup>1‡</sup>, Elizabeth V. K. Ledger<sup>1‡</sup> and Andrew M. Edwards<sup>1#</sup>

<sup>1</sup> MRC Centre for Molecular Bacteriology and Infection, Imperial College London, Armstrong Rd, London, SW7 2AZ, UK.

# For correspondence:

a.edwards@imperial.ac.uk

‡ These authors contributed equally.

Keywords: *Staphylococcus aureus* / Daptomycin / Antibiotic / Phospholipid / AFN-1252.

Running title: Daptomycin/AFN-1252 combination therapy

30 **Abstract**

31 Daptomycin is a treatment of last resort for serious infections caused by drug-resistant Gram-positive  
32 pathogens such as methicillin-resistant *Staphylococcus aureus*. We have shown recently that *S. aureus*  
33 can evade daptomycin by releasing phospholipid decoys that sequester and inactivate the antibiotic,  
34 leading to treatment failure. Since phospholipid release occurs via an active process we hypothesised  
35 that it could be inhibited, thereby increasing daptomycin efficacy. To identify opportunities for  
36 therapeutic interventions that block phospholipid release, we first determined how the host  
37 environment influenced the release of phospholipids and inactivation of daptomycin by *S. aureus*. The  
38 addition of certain host-associated fatty acids to the growth medium enhanced phospholipid release.  
39 However, in serum, the sequestration of fatty acids by albumin restricted their availability to *S. aureus*  
40 sufficiently to prevent their use in the generation of released phospholipids. This finding implied that  
41 in host tissues *S. aureus* is likely to be completely dependent upon endogenous phospholipid  
42 biosynthesis to generate lipids for release, providing a target for therapeutic intervention. To test this,  
43 we exposed *S. aureus* to AFN-1252, an inhibitor of the staphylococcal FASII fatty acid biosynthetic  
44 pathway, together with daptomycin. AFN-1252 efficiently blocked daptomycin-induced phospholipid  
45 decoy production, even in the case of isolates resistant to AFN-1252, which prevented the inactivation  
46 of daptomycin and resulted in sustained bacterial killing. In turn, daptomycin prevented the fatty acid-  
47 dependent emergence of AFN-1252-resistant isolates. In summary, AFN-1252 significantly enhances  
48 daptomycin activity against *S. aureus* by blocking the production of phospholipid decoys, whilst  
49 daptomycin blocks the emergence of resistance to AFN-1252.

50

51

52

53

54

55

56

57

58

59

## 60 Introduction

61 Daptomycin is a lipopeptide antibiotic of last resort used to treat infections caused by drug-resistant  
62 Gram-positive pathogens such as methicillin-resistant *S. aureus* (MRSA) and vancomycin-resistant  
63 enterococci (VRE) [1,2]. The target of daptomycin is the bacterial membrane, where it causes mis-  
64 localisation of enzymes required for cell wall biosynthesis, loss of membrane potential and integrity,  
65 and rapid bacterial death [1,3,4].

66 Resistance to daptomycin can arise spontaneously via mutations in genes associated with  
67 phospholipid or peptidoglycan biosynthesis [1,5,6]. However, whilst resistance has been reported to  
68 arise during treatment, it is a rare occurrence and does not explain why daptomycin treatment fails in  
69 up to 30% of cases [7,8]. In a bid to identify additional mechanisms by which *S. aureus* can withstand  
70 daptomycin treatment, we discovered that upon exposure to the antibiotic, *S. aureus* releases  
71 phospholipids into the extracellular space [9]. These phospholipids act as decoys, sequestering  
72 daptomycin and preventing it from inserting into the bacterial membrane. This decoy-mediated  
73 antibiotic inactivation led to treatment failure in a murine model of invasive MRSA infection,  
74 suggesting that it could affect daptomycin efficacy in patients [9]. Furthermore, the production of  
75 phospholipid decoys also occurs in enterococci and streptococci, suggesting a broadly conserved  
76 mechanism for resisting membrane-acting antimicrobials [10].

77 The ability of released membrane phospholipids to inactivate daptomycin can be compromised in *S.*  
78 *aureus* by the quorum-sensing-triggered production of small cytolytic peptides known as the alpha  
79 phenol soluble modulins (PSM $\alpha$ ) [9]. These peptides appear to compete with daptomycin for the  
80 phospholipid and thereby prevent inactivation of the antibiotic [9]. Whilst this may appear  
81 paradoxical, many invasive infections are caused by *S. aureus* strains defective for PSM $\alpha$  production  
82 due to defects in the Agr quorum-sensing system that triggers expression of the peptides [11-13].  
83 Furthermore, serum apolipoproteins inhibits Agr and sequesters PSMs, which would be expected to  
84 allow wild-type bacteria to inactivate daptomycin [14-17].

85 The mechanism by which daptomycin triggers phospholipid release is currently undefined. However,  
86 we have shown that it is an active process that requires energy, as well as protein, cell wall and lipid  
87 biosynthesis [9,10]. The requirement for fatty acid biosynthesis for phospholipid release is important  
88 because it raises the prospect of targeting this process to enhance daptomycin efficacy. We have  
89 shown previously that inhibition of the FabF component of the FASII fatty acid synthetic pathway,  
90 using the antibiotic platensimycin, completely blocked phospholipid release [9,10]. Whilst  
91 platensimycin is unsuitable as a therapeutic drug due to poor pharmacological properties, the FabI  
92 inhibitor AFN-1252 shows more promising characteristics and a pro-drug variant is currently

93 undergoing phase 2 clinical trials [18,19]. However, despite excellent *in vitro* activity, the therapeutic  
94 value of inhibitors of fatty acid synthesis as mono-therapeutic agents has attracted much debate  
95 [20,21]. Several bacteria, including *S. aureus*, can utilise fatty acids present in the host to generate  
96 phospholipids [21-24]. Although wild-type *S. aureus* strains cannot fully substitute exogenous fatty  
97 acids for endogenous fatty acids synthesised via FASII, there is evidence that some clinical isolates  
98 have acquired mutations that enable them to fully bypass endogenous fatty acid biosynthesis by  
99 utilising host-derived fatty acids [22,25,26]. Furthermore, *in vitro* experimentation suggests that the  
100 acquisition of such mutations is dependent upon the presence of host-associated fatty acids, which  
101 means that the frequency at which resistance to AFN-1252 emerges *in vivo* may have been under-  
102 estimated [25,26]. As such, the long-term viability of fatty acid synthesis inhibitors, such as AFN-1252,  
103 as mono-therapeutic antibacterial drugs is unclear and their ability to block daptomycin-induced  
104 phospholipid release in the presence of exogenous fatty acids undetermined [20,21].

105 Therefore, the aims of this work were to understand how the availability of fatty acids in the host  
106 influences the production of phospholipid decoys and determine whether AFN-1252 could be used in  
107 combination with daptomycin to provide a viable approach to combatting MRSA infection.

108

## 109 **Results**

### 110 **Exogenous fatty acids modulate daptomycin-induced phospholipid release**

111 The release of membrane phospholipids in response to daptomycin occurs via an active process that  
112 requires *de novo* phospholipid biosynthesis [9]. Whilst *S. aureus* has an endogenous fatty acid  
113 biosynthetic pathway (FASII), it can also incorporate fatty acids from the host into membrane  
114 phospholipid production [21-24]. Therefore, it was hypothesised that host-derived fatty acids would  
115 contribute to the production of lipids required for daptomycin-induced phospholipid release.

116 To enable accurate measurements of phospholipid release, these experiments were done in TSB  
117 containing, or not, one of several different fatty acids found in normal human serum [27]. Although  
118 the concentrations of each lipid species in serum varies, we employed a single concentration of 20  $\mu$ M  
119 to enable direct comparison. Furthermore, the *S. aureus*  $\Delta$ *agrA* mutant was used to avoid the Agr  
120 system compromising daptomycin inactivation [9].

121 As reported previously, exposure of the *S. aureus* USA300  $\Delta$ *agrA* mutant to daptomycin in the absence  
122 of exogenous fatty acids resulted in the release of phospholipids into the extracellular space (Fig. 1A)  
123 [9]. Supplementation of the TSB growth medium with linoleic acid had no effect on the rate or quantity  
124 of phospholipid released, whilst the presence of myristic or palmitic acids resulted in a small increase

125 in the quantity of phospholipids released at the latest time point (Fig. 1A). By contrast, the presence  
126 of oleic or lauric acids significantly enhanced both the rate and quantity of phospholipids released,  
127 relative to TSB without fatty acids (Fig. 1A).

128 As reported previously, in the absence of exogenous fatty acids, phospholipids released from the  
129 *ΔagrA* mutant resulted in the inactivation of daptomycin (Fig. 1B) [9]. The increased release of  
130 phospholipids from bacteria incubated with oleic or lauric acids resulted in a slightly faster rate of  
131 daptomycin inactivation, whilst the presence of linoleic, palmitic or myristic acids reduced the rate of  
132 daptomycin inactivation (Fig. 1B). Of note, *S. aureus* failed to fully inactivate daptomycin in the  
133 presence of palmitic or linoleic acids, indicating that exogenous fatty acids can retard as well as  
134 promote the rate of phospholipid-mediated daptomycin inactivation (Fig. 1B).

135 In keeping with the effect of individual fatty acids on daptomycin inactivation, the presence of oleic  
136 or lauric acid promoted bacterial survival 10-fold above that seen for *S. aureus* incubated without fatty  
137 acids by 8 h. By contrast, the presence of palmitic or linoleic acids reduced survival approximately 10-  
138 fold, whilst myristic acid had no effect (Fig. 1C).

139 Taken together, these experiments demonstrated that certain fatty acids, such as oleic and lauric  
140 acids, can significantly enhance phospholipid release, whilst others are inhibitory or have no effect.

141

#### 142 **Serum albumin restricts the utilisation of oleic acid by *S. aureus* for phospholipid release**

143 Having established that fatty acids can modulate phospholipid release in TSB, we wanted to determine  
144 whether their presence in the host context had a similar effect. To do this, we firstly supplemented  
145 TSB with 50% delipidated human serum, which is deficient for fatty acids. Similarly to what was seen  
146 in TSB alone, exposure of the *ΔagrA* mutant to daptomycin in TSB containing 50% delipidated human  
147 serum resulted in an initial fall in CFU counts, followed by a period of recovery (Fig. 2A). However, in  
148 contrast to our observations for TSB (Fig. 1C), the addition of oleic acid to TSB containing 50%  
149 delipidated serum had no effect on bacterial survival (Fig. 2A). In keeping with these data, the  
150 presence of oleic acid had no effect on the rate at which the bacteria inactivated daptomycin (Fig. 2B).  
151 This indicated that the ability of *S. aureus* to use oleic acid to promote phospholipid release was  
152 restricted by a factor found in serum but not TSB, although this was not quantified directly as serum  
153 proteins interfered with the dye-based assay system.

154 Fatty acids present in the bloodstream are typically bound to serum albumin, which acts as a  
155 carrier protein [28]. To determine whether the presence of this host protein restricted the availability  
156 of oleic acid for use in phospholipid release-mediated inactivation of daptomycin, the *S. aureus ΔagrA*

157 mutant was exposed to daptomycin in TSB containing oleic acid and human serum albumin (HSA). By  
158 contrast to TSB only, the presence of HSA completely abrogated the increased rate of daptomycin  
159 inactivation and bacterial survival observed on supplementation with oleic acid, presumably due to  
160 sequestration of the fatty acid by the protein (Fig. 2C,D). Therefore, the sequestration of oleic acid by  
161 serum albumin prevents its use by *S. aureus* to promote daptomycin-induced phospholipid release.

162

### 163 **AFN-1252 blocks daptomycin-induced phospholipid release**

164 The finding that HSA prevented the use of exogenous oleic acid by *S. aureus* to promote the rate of  
165 daptomycin inactivation indicated that this process is likely to be entirely dependent upon the FASII  
166 pathway *in vivo*. AFN-1252 is a FASII pathway inhibitor which blocks FabI and has shown potent activity  
167 against *S. aureus* in both pre-clinical and clinical testing [18,19]. Based on our previous findings [9],  
168 and the data described above, we hypothesised that AFN-1252 would enhance daptomycin activity  
169 against *S. aureus* by blocking the production of phospholipid decoys.

170 To test this, the *S. aureus*  $\Delta$ *agra* mutant was exposed to AFN-1252 (0.15  $\mu$ g ml<sup>-1</sup>) in the  
171 absence or presence of daptomycin. Alone, AFN-1252 showed bacteriostatic activity (<10-fold drop in  
172 CFU counts after 8h) (Fig. 3A). As described previously, CFU counts of the *S. aureus*  $\Delta$ *agra* mutant  
173 exposed to daptomycin fell initially, before recovering due to the release of phospholipids that led to  
174 the inactivation of the antibiotic (Fig. 3A,B,C) [9]. However, when the *S. aureus*  $\Delta$ *agra* mutant was  
175 exposed to daptomycin in the presence of AFN-1252, there was a >500-fold drop in CFU counts, with  
176 no recovery of the bacterial population (Fig. 3A). Further analysis revealed that AFN-1252 almost  
177 completely blocked daptomycin-induced phospholipid release and the associated daptomycin  
178 inactivation (Fig. 3B,C), providing an explanation for the synergy observed when these antibiotics were  
179 used in combination.

180 Whilst our data indicated that HSA restricts the utilisation of fatty acids for phospholipid  
181 release (Fig. 2C,D), we considered the possibility that some unbound lipids may arise during infection  
182 because of damage to host tissues. Therefore, we repeated the experiments described in Figures  
183 3A,B,C in the presence of oleic acid without HSA, which had previously been shown to significantly  
184 promote phospholipid release (Fig. 1A). The data generated from these experiments were almost  
185 identical to those from experiments done in the absence of the fatty acid (Fig. 3D,E,F). AFN-1252  
186 showed clear synergistic activity when used in combination with daptomycin by blocking phospholipid  
187 release, even in the presence of unbound oleic acid (Fig. 3E). This resulted in the maintenance of  
188 daptomycin activity and a sustained killing effect on *S. aureus* (Fig. 3D,F).

189 Together, these data demonstrate that AFN-1252 prevents the production of phospholipid  
190 decoys, even in the presence of exogenous fatty acids which would otherwise enhance phospholipid  
191 release. Therefore, AFN-1252 prevents subsequent recovery of the population, enhancing the ability  
192 of daptomycin to kill *S. aureus*

### 193 **Exogenous fatty acids enable emergence of resistance to AFN-1252**

194 The data described above indicated that the FASII inhibitor AFN-1252 in combination with daptomycin  
195 may be a promising therapeutic approach. However, it has been reported that *S. aureus* can acquire  
196 resistance to FASII inhibitors in the presence of exogenous fatty acids [25,26]. To confirm that these  
197 findings applied to AFN-1252, 10 parallel cultures of the USA300  $\Delta agrA$  mutant were repeatedly  
198 challenged with AFN-1252 ( $0.15 \mu\text{g ml}^{-1}$ ) in the absence or presence of a physiologically relevant fatty  
199 acid cocktail as described previously [26]. Given the impact of HSA on daptomycin inactivation, parallel  
200 assays were done with or without the serum protein. After each exposure, bacterial susceptibility to  
201 AFN-1252 was determined by broth microdilution assays to establish the MIC.

202 As expected from previous reports, there was very little change in bacterial growth (Fig. 4A) or MIC  
203 (Fig. 4B) when *S. aureus* was repeatedly exposed to AFN-1252 in the absence of fatty acids [26].  
204 However, in keeping with previous work, by the third round of exposure to AFN-1252 in the presence  
205 of fatty acids, with or without HSA, *S. aureus* was able to replicate in the presence of the antibiotic  
206 (Fig. 4A) [26]. The ability of *S. aureus* to grow in the presence of AFN-1252 after repeated exposure to  
207 the antibiotic in the presence of fatty acids, regardless of the presence of HSA, correlated well with  
208 data from subsequent MIC assays (Fig. 4C,D). When fatty acids were included in the MIC assays, there  
209 was a significant and large increase in the MICs of most cultures from  $0.03125 \mu\text{g ml}^{-1}$  to more than  
210  $16 \mu\text{g ml}^{-1}$  (>512-fold) for bacteria that were exposed to AFN-1252 in the presence of exogenous fatty  
211 acids, regardless of the presence of HSA (Fig. 4C,D). Together, these data confirmed previous work  
212 showing that repeated exposure of *S. aureus* to AFN-1252 in the presence of exogenous fatty acids  
213 facilitated the emergence of fatty acid-dependent resistance to this antibiotic [26].

214

### 215 **Daptomycin prevents fatty acid-dependent emergence of resistance to AFN-1252**

216 Having confirmed that AFN-1252 resistance can arise in the presence of fatty acids, the next objective  
217 was to test whether combination therapy with daptomycin could prevent this. Therefore, the  
218 repeated antibiotic exposure experiment described above was re-run in the presence of daptomycin  
219 ( $20 \mu\text{g ml}^{-1}$ ) and in the absence or presence of exogenous fatty acids and HSA. As expected from  
220 previous data (Fig. 3), bacterial killing with daptomycin/AFN-1252 combination therapy was highly  
221 effective for the first two exposures, where bacterial survival was 1% or less after 8 hours. An increase  
222 in bacterial survival was observed on the third exposure, but bacterial growth was still inhibited with

223 CFU counts not exceeding that of the original inoculum (Fig. 5A). Furthermore, this increase in survival  
224 was independent of the presence of fatty acids (Fig. 5A).

225 To determine whether daptomycin prevented the emergence of resistance to AFN-1252, MICs were  
226 determined by broth microdilution. By contrast to experiments with AFN-1252 alone, repeated  
227 exposure of *S. aureus* to AFN-1252 in the presence of daptomycin did not lead to an increase in MIC  
228 of the FASII inhibitor, even in the presence of fatty acids (Fig. 5B,C,D). Neither was there any increase  
229 in the daptomycin MIC (Fig. 5E,F,G). Together, these data demonstrate that daptomycin prevented  
230 the emergence of fatty acid-dependent resistance to AFN-1252 when the two antibiotics were used  
231 in combination.

232 Despite the increase in bacterial survival on the third exposure, this did not exceed the original  
233 inoculum (Fig. 5A), and the unchanged MIC values (Fig. 5B,C,D,E,F,G) indicated that AFN-1252 and  
234 daptomycin still had bacteriostatic activity. It is therefore likely that this increase in survival after 3  
235 exposures was due to the acquisition of tolerance to daptomycin, which is consistent with a previous  
236 study [29].

237

#### 238 **AFN-1252 blocks daptomycin-induced phospholipid release in AFN-1252-resistant strains**

239 Having established that the combination of daptomycin and AFN-1252 prevented the emergence of  
240 AFN-1252 resistance, we next wanted to understand the underlying mechanism. To determine this,  
241 individual colonies of AFN-1252 resistant bacteria that had arisen in the presence of fatty acids and  
242 the presence or absence of HSA were picked. These were then assessed for survival, phospholipid  
243 release and ability to inactivate daptomycin in the absence or presence of fatty acids by comparison  
244 with the  $\Delta agrA$  mutant that had not been exposed to antibiotics.

245 As described above (Fig. 3), two independent colony picks of the  $\Delta agrA$  mutant that had not previously  
246 been exposed to antibiotics survived exposure to daptomycin by releasing phospholipids that  
247 completely inactivated the antibiotic (Fig. 6A,B,C). However, the presence of AFN-1252 increased the  
248 bactericidal activity of daptomycin by preventing phospholipid release and thus preserving the activity  
249 of the lipopeptide antibiotic, regardless of the presence of fatty acids (Fig. 6A,B,C).

250 Next, we assessed the survival of bacteria from 3 independent cultures that had acquired resistance  
251 to AFN-1252 during exposure to the antibiotic in the presence of fatty acids but not HSA (AFN-1252  
252 R). Of these 3 isolates, 2 were more susceptible to daptomycin than the  $\Delta agrA$  mutant, apparently  
253 because they released lower levels of phospholipids that failed to fully inactivate the lipopeptide  
254 antibiotic (Fig. 6D,E,F). The remaining isolate reduced daptomycin activity by 70%, explaining its  
255 enhanced survival in the presence of daptomycin relative to the other 2 isolates. However, the



256 presence of AFN-1252 completely abolished the ability of any of these isolates to inactivate  
257 daptomycin, even when exogenous FAs were present (Fig. 6D,E,F).

258 We then examined *S. aureus* isolates from 3 independent cultures that had acquired resistance to  
259 AFN-1252 during exposure to the antibiotic in the presence of fatty acids and HSA (AFN-1252 R HSA).  
260 Survival of these three AFN-1252-resistant isolates after exposure to daptomycin alone was not  
261 significantly lower than that seen for the AFN-1252-sensitive  $\Delta agrA$  mutant. This was due to the  
262 release of sufficient phospholipid to inactivate all or most of the daptomycin that the bacteria were  
263 incubated with (Fig. 6G, H, I). However, despite the ability of these bacteria to grow in the presence  
264 of AFN-1252 when exogenous FAs were available, the FASII inhibitor almost completely blocked  
265 daptomycin-induced phospholipid release from all three isolates, even when the FA cocktail was  
266 present (Fig. 6G,H,I).

267 Together, these data reveal that fatty acid-enabled AFN-1252 resistance results in a reduced ability to  
268 release phospholipids in response to daptomycin (Fig. 6E, H). Furthermore, although these strains  
269 were deemed resistant to AFN-1252, daptomycin-induced phospholipid release was inhibited by the  
270 FASII inhibitor, even in the presence of exogenous fatty acids (Fig. 6F,I). This provides additional  
271 evidence that daptomycin-induced phospholipid release is dependent upon endogenous, FASII-  
272 mediated fatty acid biosynthesis, even in the case of AFN-1252 resistant bacteria that have access to  
273 exogenous fatty acids. As such, daptomycin-induced phospholipid release is efficiently blocked by  
274 AFN-1252, preventing inactivation of the lipopeptide antibiotic.

275

276

## 277 Discussion

278 The high rate of daptomycin treatment failure warrants efforts to identify new approaches to  
279 enhance therapeutic outcomes. In this report we provide evidence that combining daptomycin with  
280 the fatty acid biosynthesis inhibitor AFN-1252 provides synergistic activity against *S. aureus* and  
281 reduces the frequency of drug resistance.

282 It is increasingly clear that the host environment modulates the susceptibility of bacterial  
283 pathogens to antibiotics due to the scarcity of nutrients and the induction of stress responses that  
284 result in changes in bacterial physiology [30,31]. Serum contains high concentrations of fatty acids,  
285 which can be exploited by *S. aureus* to produce phospholipids, reducing the metabolic costs associated  
286 with membrane biogenesis [21,23]. In keeping with this, we found that the presence of specific  
287 exogenous fatty acids, such as oleic or lauric acids, enhanced phospholipid release in response to  
288 daptomycin. However, *S. aureus* has strict requirements for the type of fatty acids that it can  
289 incorporate and, at least for wild-type strains, each phospholipid must have at least one fatty acid tail

290 synthesised endogenously via FASII [32]. This requirement for FASII-mediated fatty acid biosynthesis  
291 to generate phospholipids was underlined by the ability of AFN-1252 to completely block phospholipid  
292 decoy release, regardless of the presence of oleic acid [32]. This provides evidence that  
293 daptomycin/AFN-1252 combination therapy would not be compromised by the availability of fatty  
294 acids in the host.

295         Whilst some exogenous fatty acids can be used for phospholipid biosynthesis during  
296 staphylococcal growth, it appears that their contribution to daptomycin-induced phospholipid release  
297 is severely compromised by the presence of serum albumin, which sequesters the fatty acids [28]. As  
298 described above, there is clear evidence that *S. aureus* can partially substitute endogenous fatty acid  
299 biosynthesis for exogenous host-derived fatty acids in the generation of phospholipids. However, our  
300 data demonstrate that the presence of serum albumin reduces the efficiency of this process  
301 sufficiently to prevent their use in daptomycin-induced phospholipid release, which must occur rapidly  
302 if the bacteria are to survive.

303         The successful clinical development of AFN-1252 would be a welcome addition to the arsenal  
304 of anti-staphylococcal antibiotics. However, although wild-type bacteria are dependent upon the  
305 endogenous FASII pathway to generate fatty acids for phospholipid biosynthesis, there is evidence  
306 that this is not the case in strains that have acquired mutations within the *acc* or *fabD* lipid biosynthetic  
307 gene loci [25,26]. These mutants can bypass FASII-mediated fatty acid production, conferring  
308 resistance to AFN-1252 in the presence of exogenous fatty acids [25,26]. It has been suggested that  
309 FASII bypass could compromise the long-term therapeutic viability of FASII inhibitors such as AFN-  
310 1252, a view that is supported by the identification of clinical isolates that are able to resist AFN-1252  
311 in the presence of exogenous fatty acids [25]. However, early clinical studies have shown that AFN-  
312 1252 can successfully treat skin and soft tissue infections, albeit in a relatively small number of patients  
313 [18]. Therefore, it remains to be seen whether resistance to AFN-1252 becomes a significant clinical  
314 problem. However, given the ability of *S. aureus* to acquire resistance to antibiotics, it seems prudent  
315 to develop therapeutic strategies to prevent or overcome the emergence of resistance to AFN-1252.  
316 Our data provide support for the concept of AFN-1252 resistance via fatty acid dependent FASII  
317 bypass, but also demonstrate that it can be prevented by the presence of daptomycin, at least *in vitro*.

318         The combination of AFN-1252 and daptomycin could be described as a mutually-beneficial pairing;  
319 whilst AFN-1252 promotes daptomycin activity by blocking phospholipid release, daptomycin  
320 enhances AFN-1252 efficacy by preventing the emergence of resistance. This finding contributes to  
321 our growing appreciation for the potential of combination therapy approaches to circumvent  
322 resistance mechanisms. A well-established example of this is the combination of daptomycin and  $\beta$ -

323 lactams that target penicillin-binding protein (PBP) 1. In this combination, daptomycin sensitises MRSA  
324 to  $\beta$ -lactam antibiotics by reducing the quantity of PBP2a available, whilst  $\beta$ -lactams sensitise *S. aureus*  
325 to daptomycin by increasing binding of the lipopeptide antibiotic to the bacterial membrane [33-36].  
326 This phenomenon, known as the see-saw effect, significantly promotes killing of *S. aureus* relative to  
327 each of the antibiotics individually and is currently being assessed as a therapeutic option in a clinical  
328 trial [37].

329 Although the combination of daptomycin and AFN-1252 prevented the acquisition of resistance to  
330 either antibiotic, we did observe the emergence of tolerance to the lipopeptide antibiotic after the  
331 third exposure to the drugs. The acquisition of daptomycin tolerance has been reported previously  
332 and was found to occur via increased expression of the *dltABCD* operon, although the mechanism by  
333 which this reduced susceptibility was unclear [29]. Crucially, however, whilst this tolerance phenotype  
334 reduces the ability of the daptomycin/AFN-1252 combination to kill *S. aureus*, the antibiotics are still  
335 able to inhibit bacterial growth.

336 In summary, the presence of AFN-1252 prevents the phospholipid-mediated inactivation of  
337 daptomycin by *S. aureus*, whilst daptomycin prevents the fatty-acid dependent emergence of  
338 resistance to AFN-1252. Therefore, we propose that the combination of AFN-1252 and daptomycin  
339 may have therapeutic value for the treatment of serious MRSA infections.

340

341

342

## 343 **Methods**

### 344 **Bacterial strains and growth conditions**

345 *Staphylococcus aureus* strains USA300 wild-type and  $\Delta agrA$  mutant [9] were grown in tryptic soy broth  
346 (TSB) or on tryptic soy agar (TSA). For some assays TSB was supplemented with fatty acids including  
347 oleic acid, linoleic acid, palmitic acid, myristic acid or lauric acid (all obtained from Sigma). Since the  
348 serum concentrations of these fatty acids vary from 2  $\mu$ M (lauric acid) to 122  $\mu$ M (oleic acid) [27],  
349 assays were done with a single concentration (20  $\mu$ M) within this range. For some assays, HSA was  
350 included (10 mg ml<sup>-1</sup>) to sequester fatty acids [22]. Bacteria inoculated onto TSA plates were incubated  
351 statically at 37 °C for 15-17 hours in air unless otherwise stated. Liquid cultures were grown in 3 ml  
352 broth in 30 ml universal tubes by suspending a single colony from TSA plates, and incubated at 37 °C,  
353 with shaking at 180 RPM to facilitate aeration for 15-17 hours to stationary phase. Staphylococcal  
354 colony forming units (CFU) were enumerated by serial dilution in sterile PBS and plating of aliquots  
355 onto TSA. Bacterial stocks were stored in growth medium containing 20% glycerol at - 80 °C.

356

### 357 **Antibiotic killing kinetics**

358 *S. aureus* was grown to stationary-phase in 3 ml TSB with shaking (180 RPM) at 37 °C in 30 ml universals  
359 as described above. Bacteria were subsequently adjusted to a concentration of  $\sim 1 \times 10^8$  bacteria ml<sup>-1</sup>  
360 in fresh TSB containing 0.5 mM CaCl<sub>2</sub> before antibiotics were added at the following concentrations:  
361 daptomycin (20 µg ml<sup>-1</sup>, Tocris), AFN-1252 (0.15 µg ml<sup>-1</sup>, Medchemexpress). For some experiments,  
362 TSB was supplemented with 50% normal human serum (Sigma), human serum albumin or fatty acids  
363 as indicated. Cultures were then incubated at 37 °C with shaking (180 RPM) and bacterial viability  
364 determined by CFU counts from samples taken every 2 h for 8 h.

365

### 366 **Daptomycin activity determination**

367 The activity of daptomycin during incubation with *S. aureus* was quantified as described previously  
368 [9,10]. A well of 10 mm was made in TSA plates containing 0.5 mM CaCl<sub>2</sub>, followed by the spreading  
369 of stationary phase wild-type USA300 LAC (60 µl,  $\sim 10^6$  ml<sup>-1</sup> in TSB) across the surface. When AFN-1252  
370 was used in assays, TSA was spread with *Streptococcus agalactiae* COH1 instead of *S. aureus* as this  
371 bacterium is naturally resistant to the FASII inhibitor but susceptible to daptomycin. Thereafter the  
372 plate was dried before the wells were filled with filter-sterilised culture supernatant. Plates were then  
373 incubated for 16 h at 37 °C before the zone of growth inhibition around the well was measured at 4  
374 perpendicular points. To accurately quantify daptomycin activity, a standard plot was generated for  
375 the zone of growth inhibition around wells that were filled with TSB supplemented with range of  
376 daptomycin concentrations. This enabled the conversion of the size of the zone of inhibition into  
377 percentage daptomycin activity.

378

### 379 **Phospholipid detection and quantification**

380 *S. aureus* membrane lipid was detected and quantified using FM-4-64 (Life Technologies) as described  
381 previously [9,10]. Bacterial culture supernatants (200 µl) were recovered by centrifugation (17,000 x  
382 g, 5 min) and then mixed with FM-4-64 to a final concentration of 5 µg ml<sup>-1</sup> in the wells of clear flat-  
383 bottom microtitre plates with black walls appropriate for fluorescence readings (Greiner Bio-one).  
384 Fluorescence was measured using a Tecan microplate reader, with excitation at 565 nm and emission  
385 at 660 nm to generate values expressed as relative fluorescence units (RFU). Samples were measured  
386 in triplicate for each biological repeat. TSB with or without fatty acids was mixed with the FM-4-64 dye  
387 and used as a blank. The fluorescent readings were analysed by subtracting the values from the blank  
388 readings and plotted against time.

389

### 390 **Antibiotic resistance selection assay**

391 Stationary phase *S. aureus* was inoculated at  $\sim 10^8$  CFU ml<sup>-1</sup> into 3 ml TSB with 0.5 mM CaCl<sub>2</sub> containing  
392 antibiotics as specified, for 8 h per exposure. Daptomycin (20 µg ml<sup>-1</sup>) and/or AFN-1252 (0.15 µg ml<sup>-1</sup>)  
393 were used singly or in combination. After 8 h, bacterial survival was determined by calculating the  
394 fold-change (for assays with the bacteriostatic AFN-1252 only) or percentage-change (for assays with  
395 the bactericidal antibiotic daptomycin) in CFU relative to the inoculum. For repeated antibiotic  
396 exposure, 1 ml was removed from each culture post-antibiotic exposure, centrifuged (3 min, 17,000 x  
397 g) and the resulting pellet washed once in TSB before resuspension in 100 µl TSB. This was used to  
398 inoculate 3 ml TSB before incubation for 16 h at 37 °C with shaking (180 RPM) in the absence of  
399 antibiotics. Bacterial exposure to antibiotics was then repeated twice for a total of three repeated  
400 exposures. In some experiments, the broth was supplemented with a fatty acid cocktail prepared as  
401 follows: myristic, palmitic and oleic acid (all from Sigma-Aldrich) were made up to 100 mM in dimethyl  
402 sulfoxide (DMSO) as described previously [26]. Where used, the fatty acid cocktail was diluted 1 in  
403 2000 in culture medium to obtain a final concentration of 50 µM. In some cases, TSB was also  
404 supplemented with human serum albumin (Sigma-Aldrich) at 10 µg ml<sup>-1</sup>.

405

### 406 **Determination of antibiotic minimal inhibitory concentrations**

407 Antibiotic susceptibility was determined using the broth microdilution procedure as described  
408 previously [38] to generate minimal inhibitory concentrations for daptomycin and AFN-1252.  
409 Antibiotics were diluted serially in 2-fold steps in TSB containing 0.5 mM CaCl<sub>2</sub> in a 96-well microtitre  
410 plate to obtain a range of concentrations. In some assays, a fatty acid cocktail (50 µM) was added to  
411 the broth as described above for the resistance selection assay. Stationary phase bacteria were added  
412 to the wells to give a final concentration of  $5 \times 10^5$  CFU ml<sup>-1</sup> and the microtitre plates incubated  
413 statically in air at 37 °C for 18 h. The MIC was defined as the minimum concentration of antibiotic  
414 needed to inhibit visible growth of the bacteria [38]. For some assays, fold change in MIC was  
415 calculated relative to the MIC of the USA300  $\Delta agrA$  mutant which had not been exposed to antibiotics.

416

### 417 **Acknowledgements**

418 EVKL is supported by a Wellcome Trust PhD Studentship (203812/Z/16/Z). AME acknowledges funding  
419 from the Department of Medicine, Imperial College and from the Imperial NIHR Biomedical Research  
420 Centre, Imperial College London.

421

## 422 References

- 423 1. Miller WR, Bayer AS, Arias CA. Mechanism of Action and Resistance to Daptomycin in  
424 *Staphylococcus aureus* and Enterococci. 2016. Cold Spring Harb Perspect Med 6:a026997.
- 425 2. Bal AM, David MZ, Garau J, Gottlieb T, Mazzei T, Scaglione F, Tattevin P, Gould IM. 2017.  
426 Future trends in the treatment of methicillin-resistant *Staphylococcus aureus* (MRSA) infection: An in-  
427 depth review of newer antibiotics active against an enduring pathogen. J Glob Antimicrob Resist  
428 10:295-303.
- 429 3. Alborn WE Jr, Allen NE, Preston DA. 1991. Daptomycin disrupts membrane potential in  
430 growing *Staphylococcus aureus*. *Antimicrob Agents Chemother* 35:2282-7.
- 431 4. Müller A, Wenzel M, Strahl H, Grein F, Saaki TN, Kohl B, Siersma T, Bandow JE, Sahl HG,  
432 Schneider T, Hamoen LW. Daptomycin inhibits cell envelope synthesis by interfering with fluid  
433 membrane microdomains. *Proc Natl Acad Sci USA* 113 (45) E7077-E7086.
- 434 5. Pader V, Edwards AM. 2017. Daptomycin: new insights into an antibiotic of last resort. *Future*  
435 *Microbiol* 12:461-464.
- 436 6. Tran TT, Munita JM, Arias CA. 2015. Mechanisms of drug resistance: daptomycin resistance.  
437 *Ann N Y Acad Sci* 1354:32-53.
- 438 7. Stefani, S. Campanile F, Santagati M, Mezzatesta ML, Cafiso V, Pacini G. 2015. Insights and  
439 clinical perspectives of daptomycin resistance in *Staphylococcus aureus*: A review of the available  
440 evidence. *Int J Antimicrob Agents* 46:278-289.
- 441 8. Seaton RA, Menichetti F, Dalekos G, Beiras-Fernandez A, Nacinovich F, Pathan R, Hamed K.  
442 2015. Evaluation of Effectiveness and Safety of High-Dose Daptomycin: Results from Patients Included  
443 in the European Cubicin(®) Outcomes Registry and Experience. *Adv Ther* 12:1192-1205.
- 444 9. Pader V, Hakim S, Painter KL, Wigneshweraraj S, Clarke TB, Edwards AM. 2016. *Staphylococcus*  
445 *aureus* inactivates daptomycin by releasing membrane phospholipids. *Nat Microbiol* 2:16194.
- 446 10. Ledger EVK, Pader V, Edwards AM. 2017. *Enterococcus faecalis* and pathogenic streptococci  
447 inactivate daptomycin by releasing phospholipids. *Microbiology* 163: 1502-1508.
- 448 11. Painter KL, Krishna A, Wigneshweraraj S, Edwards AM. 2014. What role does the quorum-  
449 sensing accessory gene regulator system play during *Staphylococcus aureus* bacteremia? *Trends*  
450 *Microbiol* 22:676-85.
- 451 12. Fowler VG, Sakoulas G, McIntyre LM, Meka VG, Arbeit RD, Cabell CH, Stryjewski ME, Eliopoulos  
452 GM, Reller LB, Corey GR, Jones T, Lucindo N, Yeaman MR, Bayer AS. 2004. Persistent bacteremia due  
453 to methicillin-resistant *Staphylococcus aureus* infection is associated with *agr* dysfunction and low-  
454 level *in vitro* resistance to thrombin-induced platelet microbicidal protein. *J Infect Dis* 190:1140-1149.

- 455 13. Traber KE, Lee E, Benson S, Corrigan R, Cantera M, Shopsin B, Novick RP. 2008. *agr* function in  
456 clinical *Staphylococcus aureus* isolates. *Microbiology* 154:2265–2274.
- 457 14. James EH, Edwards AM, Wigneshweraraj S. 2013. Transcriptional downregulation of *agr*  
458 expression in *Staphylococcus aureus* during growth in human serum can be overcome by constitutively  
459 active mutant forms of the sensor kinase AgrC. *FEMS Microbiol Lett* 349:153-62.
- 460 15. Manifold-Wheeler BC, Elmore BO, Triplett KD, Castleman MJ, Otto M, Hall PR. 2016. Serum  
461 Lipoproteins Are Critical for Pulmonary Innate Defense against *Staphylococcus aureus* Quorum  
462 Sensing. *J Immunol* 196:328-35.
- 463 16. Yarwood JM, McCormick JK, Paustian ML, Kapur V, Schlievert PM. 2002. Repression of the  
464 *Staphylococcus aureus* accessory gene regulator in serum and *in vivo*. *J Bacteriol* 184:1095-101.
- 465 17. Surewaard BG, Nijland R, Spaan AN, Kruijtz JA, de Haas CJ, van Strijp JA. 2012. Inactivation  
466 of staphylococcal phenol soluble modulins by serum lipoprotein particles. *PLoS Pathog* 8:e1002606.
- 467 18. Hafkin B, Kaplan N, Murphy B. 2015. Efficacy and Safety of AFN-1252, the First *Staphylococcus*-  
468 Specific Antibacterial Agent, in the Treatment of Acute Bacterial Skin and Skin Structure Infections,  
469 Including Those in Patients with Significant Comorbidities. *Antimicrob Agents Chemother* 60:1695-  
470 1701.
- 471 19. Hunt T, Kaplan N, Hafkin B. 2016. Safety, tolerability and pharmacokinetics of multiple oral  
472 doses of AFN-1252 administered as immediate release (IR) tablets in healthy subjects. *J Chemother*  
473 28:164-171.
- 474 20. Morvan C, Halpern D, Kénanian G, Pathania A, Anba-Mondoloni J, Lamberet G, Gruss A, Gloux  
475 K. 2017. The *Staphylococcus aureus* FASII bypass escape route from FASII inhibitors. *Biochimie* 141:40-  
476 46.
- 477 21. Yao J, Rock CO. 2017. Exogenous fatty acid metabolism in bacteria. *Biochimie* 141:30-39.
- 478 22. Parsons JB, Broussard TC, Bose JL, Rosch JW, Jackson P, Subramanian C, Rock CO. 2014.  
479 Identification of a two-component fatty acid kinase responsible for host fatty acid incorporation by  
480 *Staphylococcus aureus*. *Proc Natl Acad Sci U S A* 111:10532-10537.
- 481 23. Sen S, Sirobhushanam S, Johnson SR, Song Y, Tefft R, Gatto C, Wilkinson BJ. 2016. Growth-  
482 Environment Dependent Modulation of *Staphylococcus aureus* Branched-Chain to Straight-Chain Fatty  
483 Acid Ratio and Incorporation of Unsaturated Fatty Acids. *PLoS One* 11:e0165300.
- 484 24. Delekta PC, Shook JC, Lydic TA, Mulks MH, Hammer ND. 2018. *Staphylococcus aureus* utilizes  
485 host-derived lipoprotein particles as sources of exogenous fatty acids. *J Bacteriol* pii: JB.00728-17. doi:  
486 10.1128/JB.00728-17. [Epub ahead of print]

- 487 25. Gloux K, Guillemet M, Soler C, Morvan C, Halpern D, Pourcel C, Vu Thien H, Lamberet G, Gruss  
488 A. 2017. Clinical Relevance of Type II Fatty Acid Synthesis Bypass in *Staphylococcus aureus*. *Antimicrob*  
489 *Agents Chemother* 61: e02515-16.
- 490 26. Morvan C, Halpern D, Kénanian G, Hays C, Anba-Mondoloni J, Brinster S, Kennedy S, Trieu-  
491 Cuot P, Poyart C, Lamberet G, Gloux K, Gruss A. 2016. Environmental fatty acids enable emergence of  
492 infectious *Staphylococcus aureus* resistant to FASII-targeted antimicrobials. *Nat Commun* 7:12944.
- 493 27. Psychogios N, Hau DD, Peng J, Guo AC, Mandal R, Bouatra S, Sinelnikov I, Krishnamurthy R,  
494 Eisner R, Gautam B, Young N, Xia J, Knox C, Dong E, Huang P, Hollander Z, Pedersen TL, Smith SR,  
495 Bamforth F, Greiner R, McManus B, Newman JW, Goodfriend T, Wishart DS. 2011. The human serum  
496 metabolome. *PLoS One* 6:e16957.
- 497 28. van der Vusse GJ. 2009. Albumin as fatty acid transporter. *Drug Metab Pharmacokinet* 24:300-  
498 7.
- 499 29. Mechler L, Bonetti EJ, Reichert S, Flötenmeyer M, Schrenzel J, Bertram R, François P, Götz F.  
500 2016. Daptomycin Tolerance in the *Staphylococcus aureus* pitA6 Mutant Is Due to Upregulation of the  
501 *dlt* Operon. *Antimicrob Agents Chemother* 60:2684-91.
- 502 30. Fisher RA, Gollan B, Helaine S. 2017. Persistent bacterial infections and persister cells. *Nat Rev*  
503 *Microbiol* 15:453–464.
- 504 31. Ersoy SC, Heithoff DM, Barnes L, Tripp GK, House JK, Marth JD, Smith JW, Mahan MJ. 2017.  
505 Correcting a Fundamental Flaw in the Paradigm for Antimicrobial Susceptibility Testing. *EBioMedicine*  
506 20:173-181.
- 507 32. Parsons JB, Frank MW, Subramanian C, Saenkham P, Rock CO. 2011. Metabolic basis for the  
508 differential susceptibility of Gram-positive pathogens to fatty acid synthesis inhibitors. *Proc Natl Acad*  
509 *Sci U S A* 108:15378-15383.
- 510 33. Mehta S, Singh C, Plata KB, Chanda PK, Paul A, Riosa S, Rosato RR, Rosato AE. 2012.  $\beta$ -Lactams  
511 increase the antibacterial activity of daptomycin against clinical methicillin-resistant *Staphylococcus*  
512 *aureus* strains and prevent selection of daptomycin-resistant derivatives. *Antimicrob Agents*  
513 *Chemother* 56:6192-6200.
- 514 34. Berti AD, Sakoulas G, Nizet V, Tewhey R, Rose WE. 2013.  $\beta$ -Lactam antibiotics targeting PBP1  
515 selectively enhance daptomycin activity against methicillin-resistant *Staphylococcus aureus*.  
516 *Antimicrob Agents Chemother* 57:5005-5012.
- 517 35. Werth BJ, Sakoulas G, Rose WE, Pogliano J, Tewhey R, Rybak MJ. 2013. Ceftaroline increases  
518 membrane binding and enhances the activity of daptomycin against daptomycin-nonsusceptible  
519 vancomycin-intermediate *Staphylococcus aureus* in a pharmacokinetic/pharmacodynamic model.  
520 *Antimicrob Agents Chemother* 57:66-73.



- 521 36. Renzoni A, Kelley WL, Rosato RR, Martinez MP, Roch M, Fatouraei M, Haeusser DP, Margolin  
522 W, Fenn S, Turner RD, Foster SJ, Rosato AE. 2016. Molecular Bases Determining Daptomycin  
523 Resistance-Mediated Resensitization to  $\beta$ -Lactams (Seesaw Effect) in Methicillin-Resistant  
524 *Staphylococcus aureus*. Antimicrob Agents Chemother 61: e01634-16.
- 525 37. Tong SY, Nelson J, Paterson DL, Fowler VG Jr, Howden BP, Cheng AC, Chatfield M, Lipman J,  
526 Van Hal S, O'Sullivan M, Robinson JO, Yahav D, Lye D, Davis JS; CAMERA2 study group and the  
527 Australasian Society for Infectious Diseases Clinical Research Network. 2016. CAMERA2 - combination  
528 antibiotic therapy for methicillin-resistant *Staphylococcus aureus* infection: study protocol for a  
529 randomised controlled trial. Trials 17:170.
- 530 38. Wiegand I, Hilpert K, Hancock RE. 2008. Agar and broth dilution methods to determine the  
531 minimal inhibitory concentration (MIC) of antimicrobial substances. Nat Protoc 3:163-175.
- 532  
533  
534  
535  
536  
537  
538  
539  
540  
541  
542  
543  
544  
545  
546  
547  
548  
549  
550  
551  
552  
553  
554

555 **Figures**

556

557

558

559

560

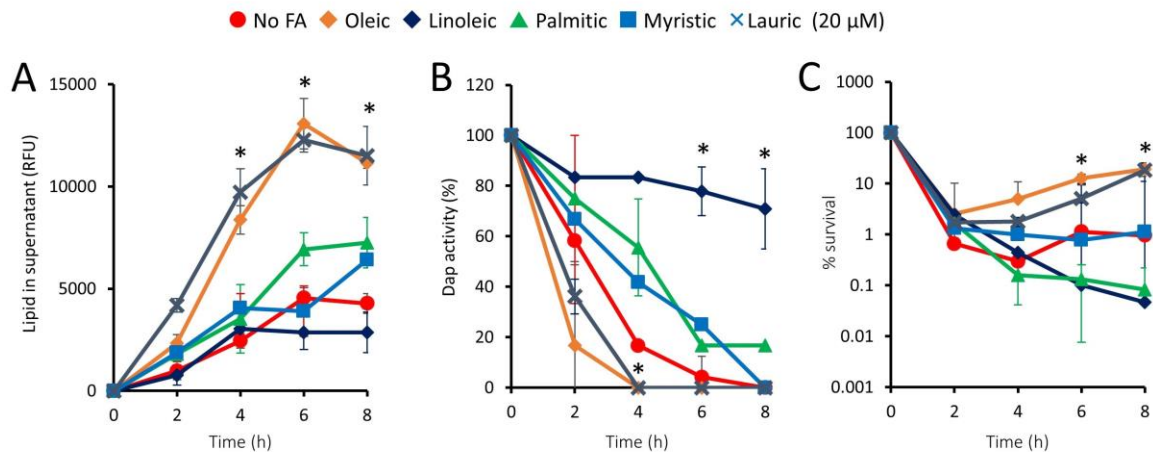

561

562 Figure 1. Effect of exogenous fatty acids on daptomycin-induced phospholipid release, daptomycin  
563 inactivation and bacterial survival. *S. aureus*  $\Delta$ *agrA* was exposed to daptomycin ( $20 \mu\text{g ml}^{-1}$ ) in the  
564 presence of calcium ( $0.5 \text{ mM}$ ) and the indicated fatty acid supplements ( $20 \mu\text{M}$ ) or none (No FA), and  
565 the release of phospholipids (A), antibiotic activity (B) and bacterial survival (C) measured over time.  
566 Data represent the means of 4 independent experiments and error bars show the standard deviation  
567 of the mean. Values significantly different ( $P < 0.05$ ) from bacteria in broth without fatty acid  
568 supplements were identified by 2-way repeated measures ANOVA and Dunnett's post-hoc test (\*).

569

570

571

572

573

574

575

576

577

578

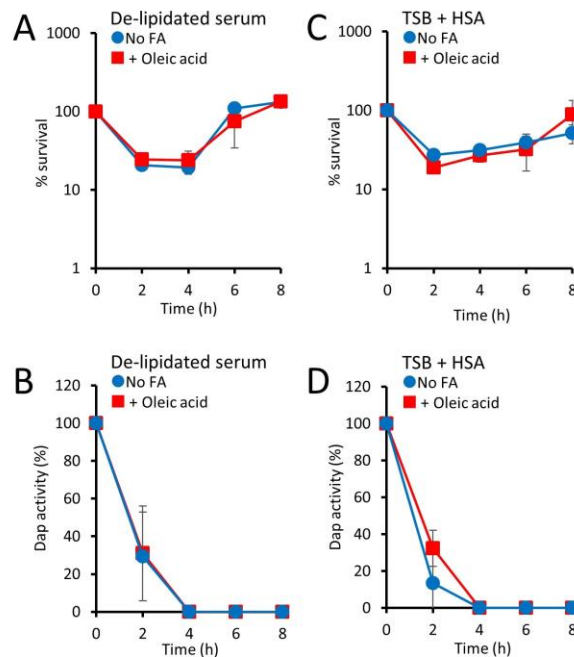

579

580 Figure 2. Human serum albumin prevents the use of exogenous oleic acid in daptomycin-induced  
581 phospholipid release. The *S. aureus*  $\Delta agrA$  mutant was exposed to daptomycin ( $20 \mu\text{g ml}^{-1}$ ) in TSB  
582 containing 50% delipidated human serum and  $\text{CaCl}_2$  (0.5 mM) and supplemented with oleic acid ( $20$   
583  $\mu\text{M}$ ) or not (No FA), and bacterial survival (A) and antibiotic activity (B) measured over time. In a similar  
584 experiment, *S. aureus*  $\Delta agrA$  was exposed to daptomycin in TSB containing human serum albumin  
585 (HSA) and  $\text{CaCl}_2$  and supplemented with oleic acid ( $20 \mu\text{M}$ ) or not (No FA), and bacterial survival (C)  
586 and antibiotic activity (D) measured over time. Data represent the means of 4 independent  
587 experiments and error bars show the standard deviation of the mean. There were no significant  
588 differences in values obtained with oleic acid compared to un-supplemented medium ( $P > 0.05$ ) as  
589 determined by 2-way repeated measures ANOVA.

590

591

592

593

594

595

596

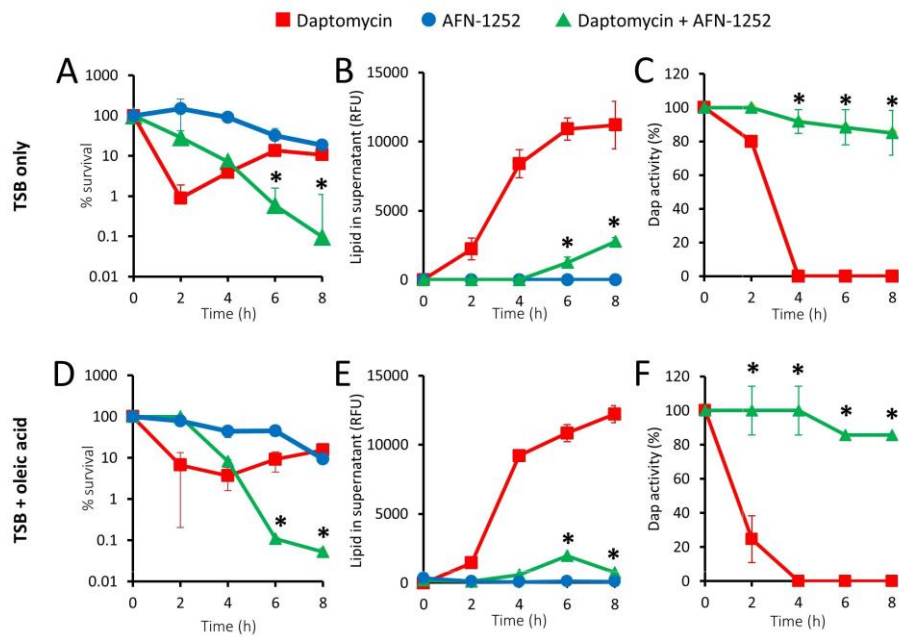

597

598 Figure 3. AFN-1252 blocks phospholipid release and therefore preserves daptomycin activity. The *S.*  
599 *aureus*  $\Delta$ *agrA* mutant was incubated in TSB containing CaCl<sub>2</sub> (0.5 mM) and daptomycin (20  $\mu$ g ml<sup>-1</sup>) or  
600 AFN-1252 (0.15  $\mu$ g ml<sup>-1</sup>), or both antibiotics in the absence (A,B,C) or presence (D,E,F) of oleic acid (20  
601  $\mu$ M). During incubation, bacterial survival (A,D), quantity of phospholipid released into the  
602 supernatant (B,E) and antibiotic activity (C,F) was measured over 8 h. Data represent the means of 4  
603 independent experiments and error bars show the standard deviation of the mean. Values significantly  
604 different ( $P < 0.05$ ) from those obtained with bacteria exposed to daptomycin only were identified by  
605 2-way repeated measures ANOVA and Dunnett's post-hoc test (\*).

606

607

608

609

610

611

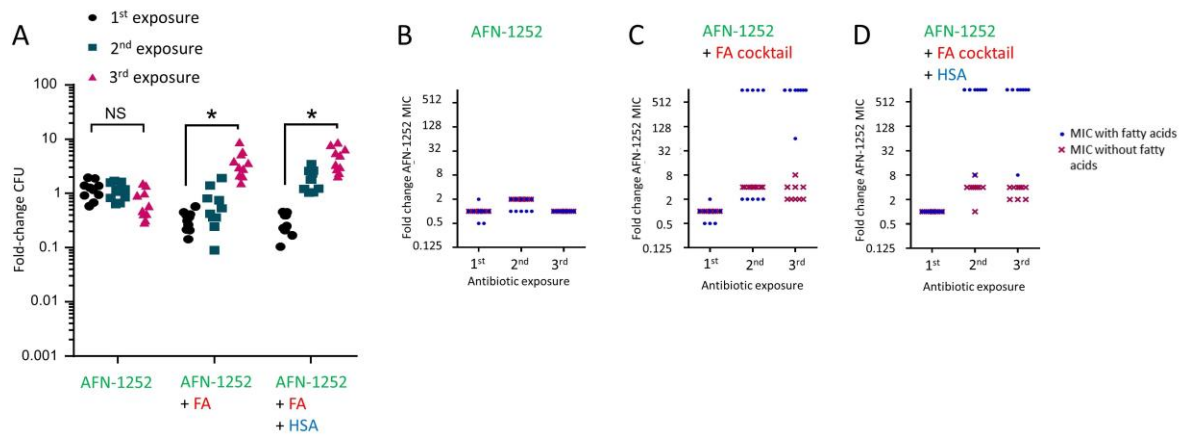

612

613 Figure 4. Exogenous fatty acids enable the acquisition of resistance to AFN-1252. Ten parallel cultures  
614 of the *S. aureus*  $\Delta agrA$  mutant were exposed to AFN-1252 ( $0.15 \mu\text{g ml}^{-1}$ ) in the absence or presence of  
615  $50 \mu\text{M}$  fatty acids (FA) cocktail and absence or presence of HSA for 8 h before bacterial replication (A)  
616 and the AFN-1252 MIC determined in the absence or presence of FA cocktail (FA) (B,C,D). Each symbol  
617 represents an independent culture ( $n = 10$  in each case). After 8 h exposure to AFN-1252, bacteria  
618 were recovered by centrifugation, washed and grown in antibiotic-free medium for 16 h before second  
619 and third rounds of antibiotic exposure and subsequent determination of bacterial survival and MIC.  
620 Differences in survival between the 1<sup>st</sup> and 3<sup>rd</sup> rounds of AFN-1252 exposure under identical conditions  
621 were analysed using a one-way ANOVA with Dunn's multiple comparisons test (\* $P < 0.001$ ).

622

623

624

625

626

627

628

629

630

631

632

633

634

635

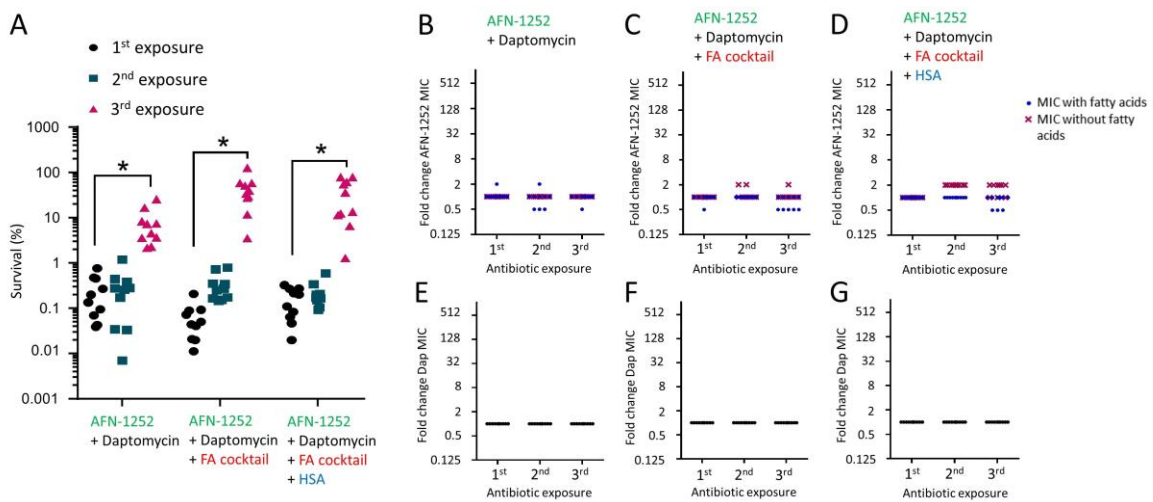

636

637 Figure 5. Daptomycin prevents the acquisition of fatty-acid enabled resistance to AFN-1252. Ten  
638 parallel cultures of *S. aureus ΔagrA* were exposed to daptomycin (20 μg ml<sup>-1</sup>) AFN-1252 (0.15 μg ml<sup>-1</sup>)  
639 in the absence or presence of fatty acid cocktail and absence or presence of HSA for 8 h before  
640 bacterial survival (A) and the AFN-1252 MICs determined in the absence or presence of fatty acids  
641 (B,C,D). The daptomycin MICs were also determined (in the absence of fatty acids) (E,F,G). After 8 h  
642 exposure to daptomycin and AFN-1252, bacteria were recovered by centrifugation, washed and grown  
643 in antibiotic-free medium for 16 h before second and third rounds of antibiotic exposure and  
644 subsequent determination of bacterial survival and MIC. Each symbol represents an independent  
645 culture (n = 10 in each case). Differences in survival between rounds of antibiotic exposure under  
646 identical conditions were identified using a one-way ANOVA with Dunn's multiple comparisons test  
647 (\*P < 0.001).

648

649

650

651

652

653

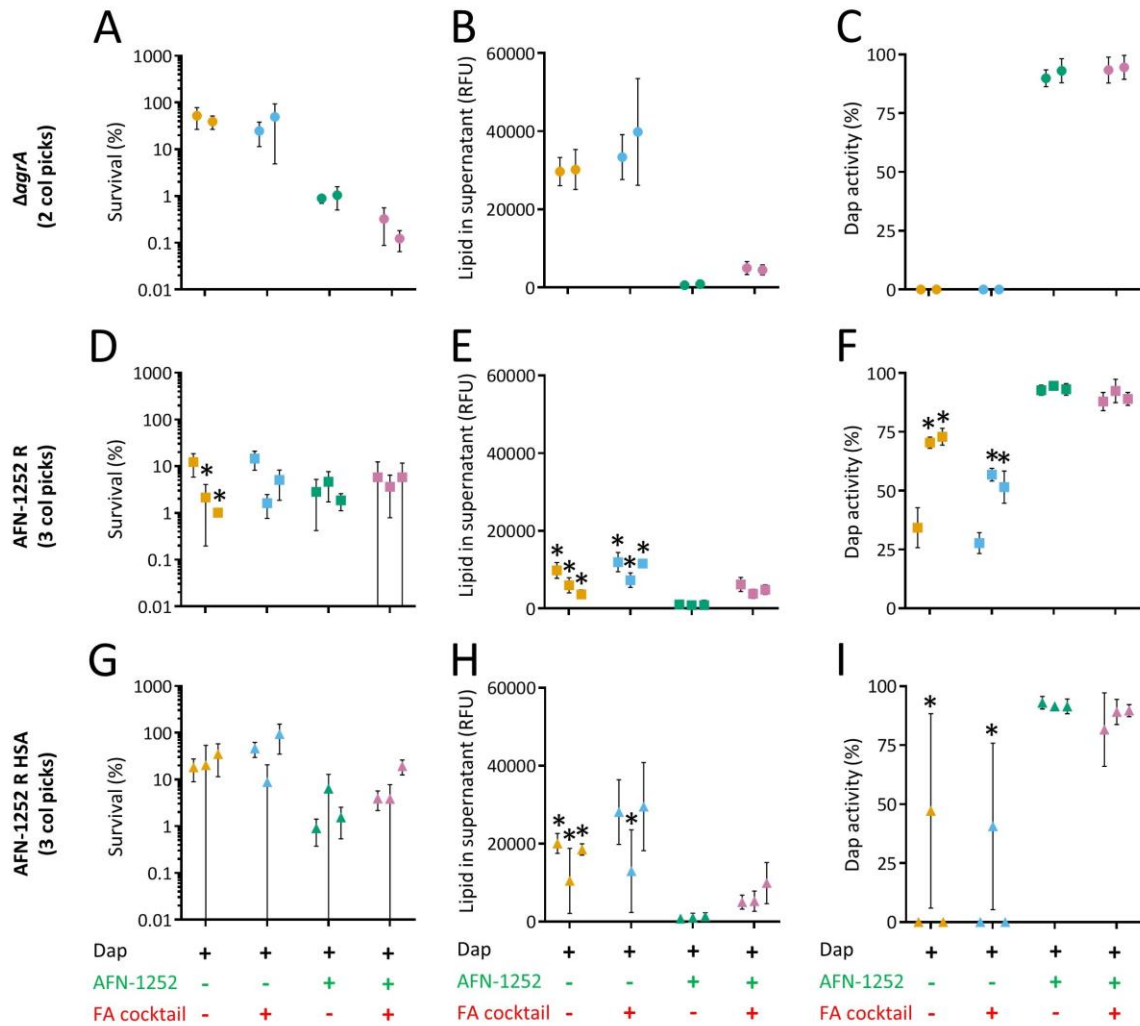

654

655 Figure 6. AFN-1252 prevents daptomycin-induced phospholipid release, even in the case of AFN-1252  
 656 resistant strains. Two independent isolates (each represented by a single circle) of the *S. aureus*  $\Delta agrA$   
 657 mutant (USA300  $\Delta agrA$ ) that had not been exposed to antibiotic (A,B,C), three independent isolates  
 658 of *S. aureus*  $\Delta agrA$  that had acquired resistance to AFN-1252 in the presence of the FA cocktail but  
 659 absence of HSA (AFN-1252 R) (D,E,F) or three independent isolates of *S. aureus*  $\Delta agrA$  that had  
 660 acquired resistance to AFN-1252 in the presence of the FA cocktail and HSA (AFN-1252 R HSA) (G,H,I)  
 661 were exposed to daptomycin (Dap) in the presence or absence of various combinations of AFN-1252  
 662 (AFN) and fatty acid cocktail (FA) for 8 h. After this time, bacterial survival (A,D,G), the quantity of  
 663 released phospholipid (B,E,H) and the activity of daptomycin (C,F,I) was determined. Data represent  
 664 the mean of 3 independent experiments and error bars represent the standard deviation of the mean.  
 665 Differences in survival, phospholipid release or daptomycin activity were compared between the AFN-  
 666 1252 sensitive USA300  $\Delta agrA$  isolates and AFN-1252 resistant isolates using a one-way ANOVA with  
 667 Dunn's multiple comparisons test (\* $P < 0.01$ ).
